# Supplementary material
Source: PubMed Central journal article supplement (PMC2835493)
Supplement: NIHMS177184-supplement-01.pdf [file NIHMS177184-supplement-01.pdf]

**A**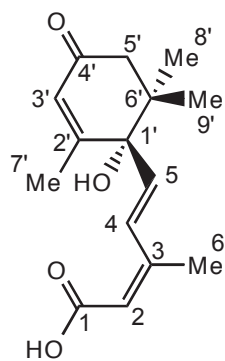

(+)-ABA

**B**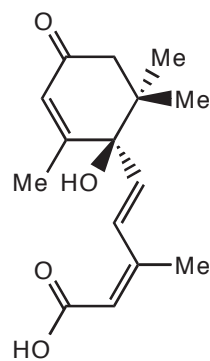

(-)-ABA

Nishimura et al. Figure S1

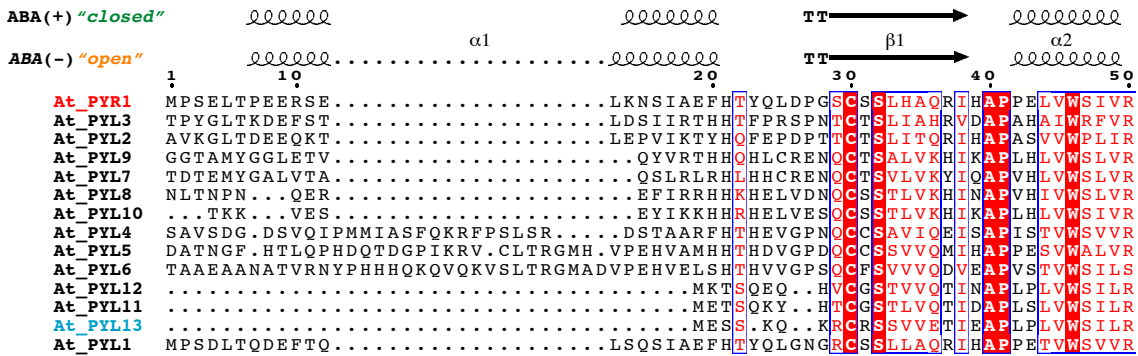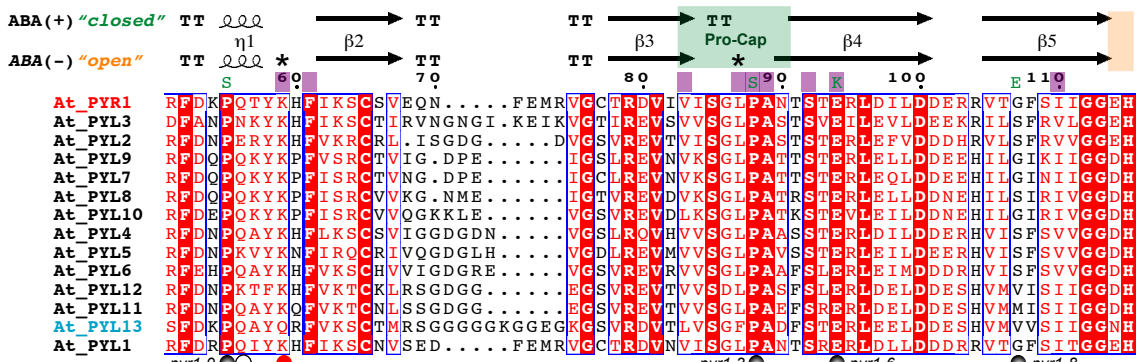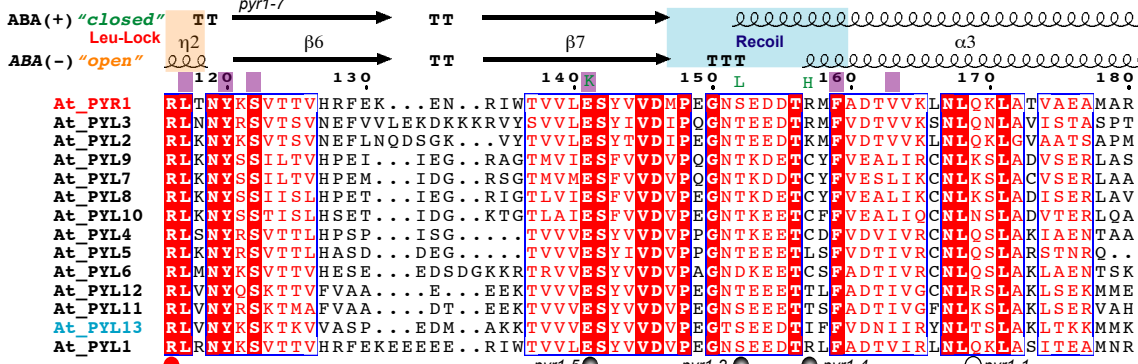

190 Gene id:

|          |                              |           |
|----------|------------------------------|-----------|
| At_PYL1  | NSGDGSGSQVT.....             | AT4G17870 |
| At_PYL3  | .....                        | AT1G73000 |
| At_PYL2  | HDDE.....                    | AT2G26040 |
| At_PYL9  | QDITQ.....                   | AT1G01360 |
| At_PYL7  | QDITNSIATFCNASNGYREKNHTE TNL | AT4G01026 |
| At_PYL8  | QDTTESRV.....                | AT5G53160 |
| At_PYL10 | ES.MEKKI.....                | AT4G27920 |
| At_PYL4  | ESKKKMSL.....                | AT2G38310 |
| At_PYL5  | .....                        | AT5G05440 |
| At_PYL6  | FS.....                      | AT2G40330 |
| At_PYL12 | LT.....                      | AT5G45870 |
| At_PYL11 | LKL.....                     | AT5G45860 |
| At_PYL13 | .....                        | AT4G18620 |
| At_PYL1  | NNNNNSSQVR.....              | AT5G46790 |

Pro-Cap      ● mutational sites  
 Leu-Lock      ● point mutation  
 Recoil      ○ stop (green letters)  
 ABA binding      ● designed mutation

Nishimura et al. Figure S2

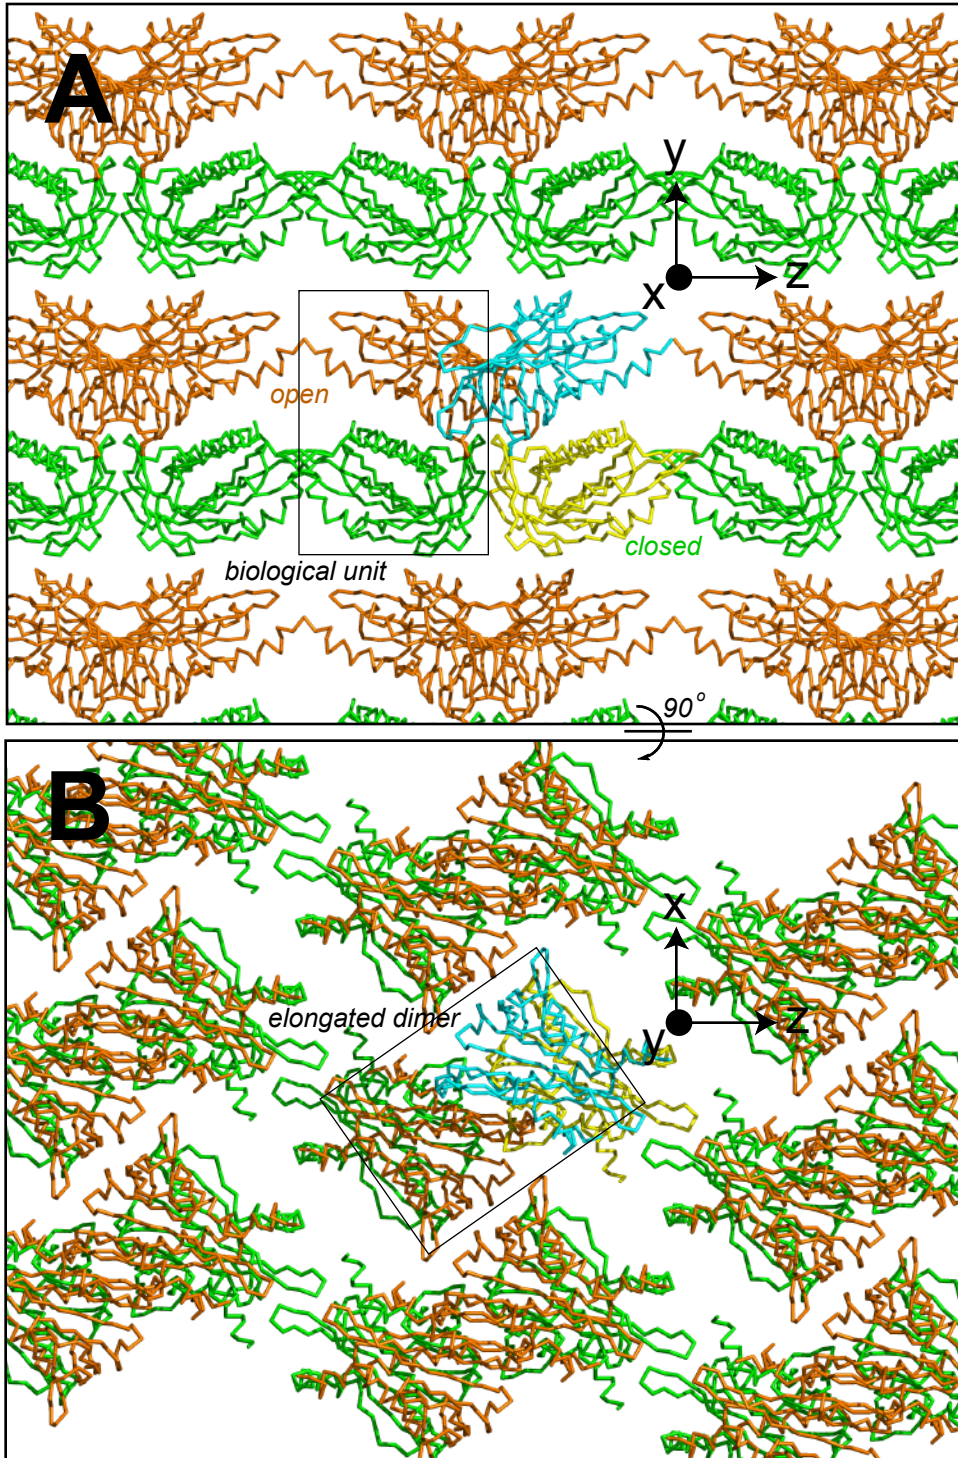

Nishimura et al. Figure S3

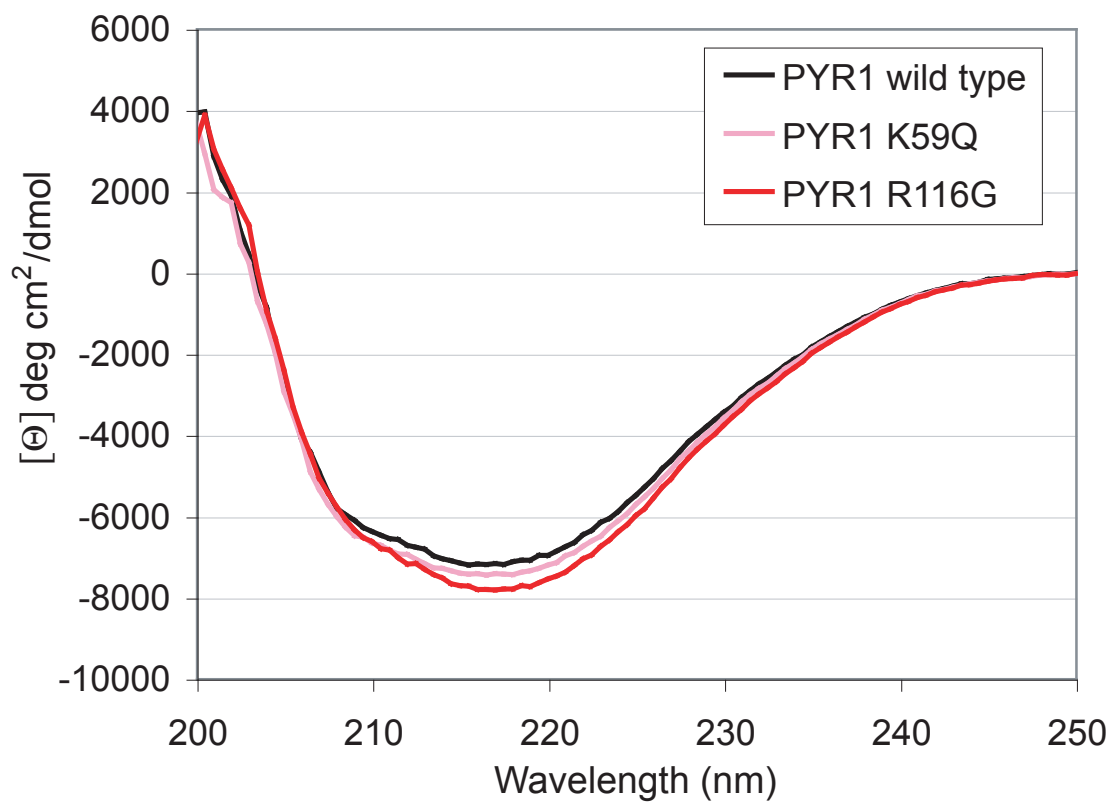

Nishimura et al. Figure S4

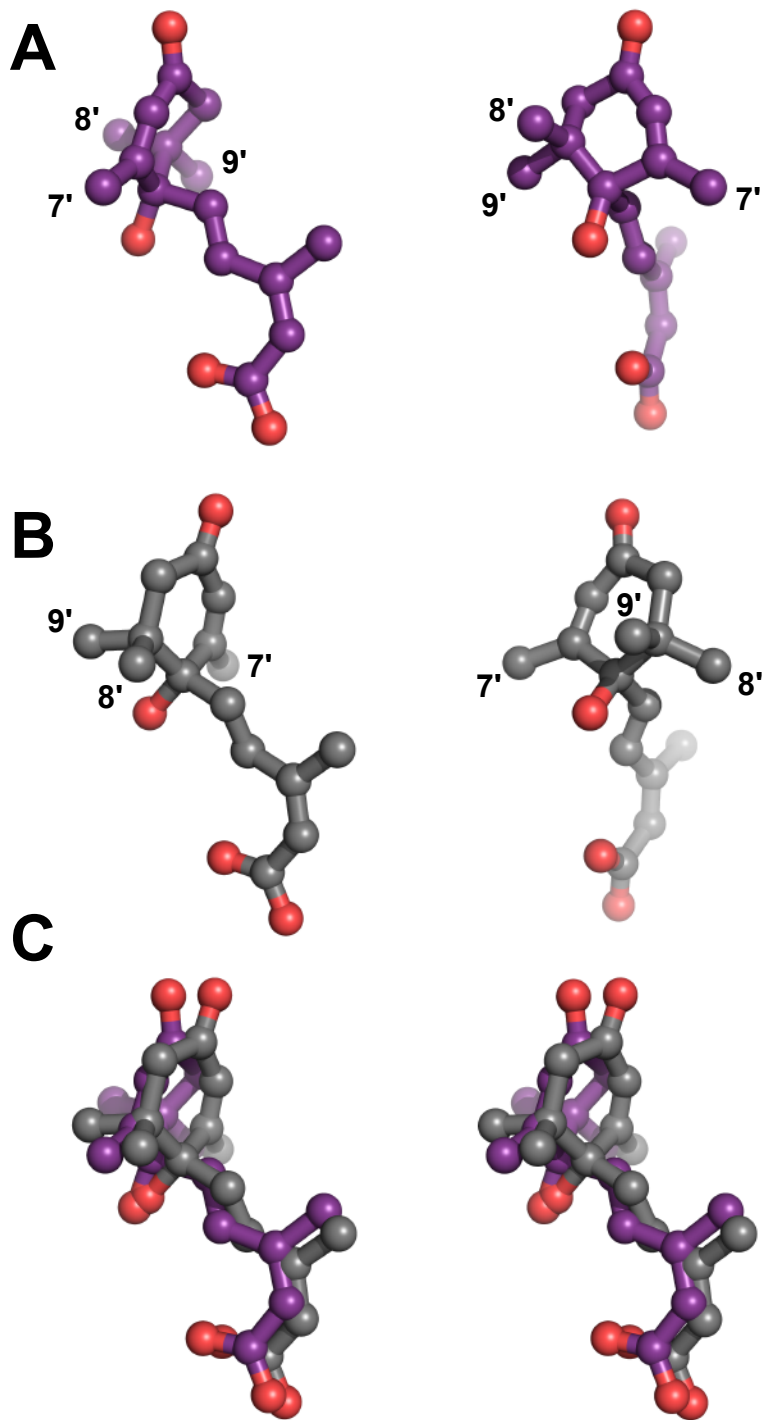

Nishimura et al. Figure S5
